# Supplementary material for: The Proteasome Governs Fungal Morphogenesis via Functional Connections with Hsp90 and cAMP-Protein Kinase A Signaling
Source: PubMed Central journal article supplement (PMC7175089; doi:10.1128/mbio.00290-20), 2020-04-21

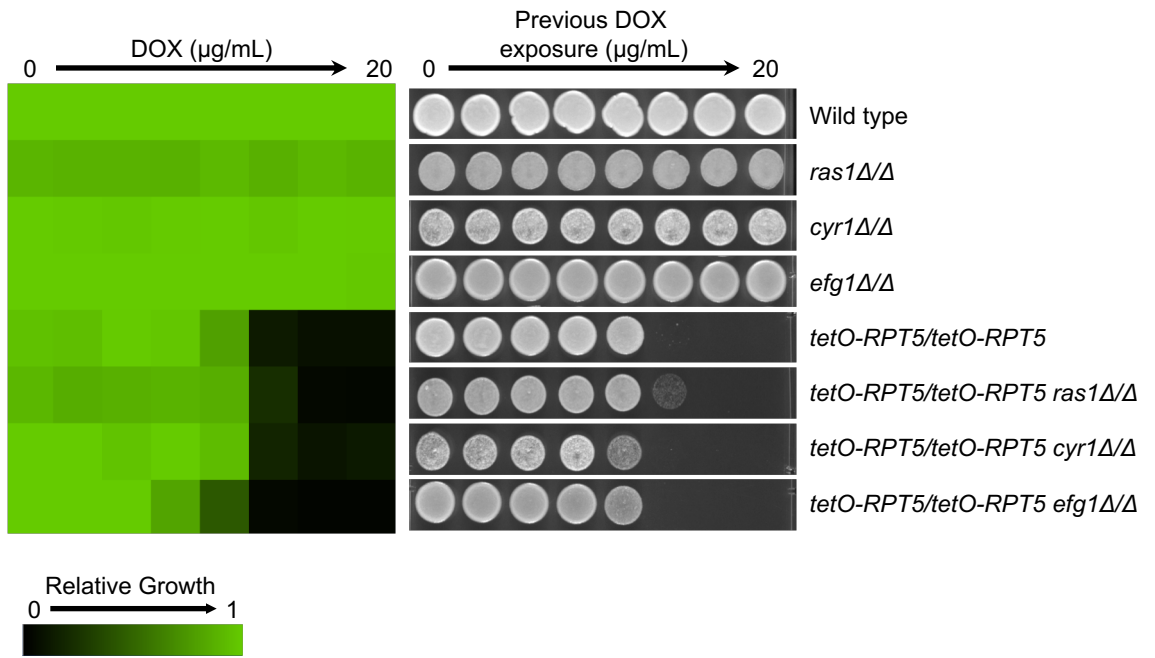

Supplement: mBio.00290-20-sf004.pdf [file mBio.00290-20-sf004.pdf]
