# Supplementary material for: The Proteasome Governs Fungal Morphogenesis via Functional Connections with Hsp90 and cAMP-Protein Kinase A Signaling
Source: PubMed Central journal article supplement (PMC7175089; doi:10.1128/mbio.00290-20), 2020-04-21
Supplement: mBio.00290-20-st001.pdf [file mBio.00290-20-st001.pdf]

**Table S1:** Strains used in this study.

| Strain Name           | Alias                                         | Genotype                                                                                                                                                                            | Source      |
|-----------------------|-----------------------------------------------|-------------------------------------------------------------------------------------------------------------------------------------------------------------------------------------|-------------|
| ScLC382               | <i>S. cerevisiae</i> Sigma                    | <i>ura3Δ</i>                                                                                                                                                                        | Kohler Lab  |
| CkLC571               | <i>Candida krusei</i> 1680                    | Clinical isolate                                                                                                                                                                    | Heitman Lab |
| CILC572               | <i>C. lusitaniae</i><br>(ATCC® 42720™)        | Clinical isolate                                                                                                                                                                    | ATCC        |
| CtLC575               | <i>C. tropicalis</i> 1685                     | Clinical isolate                                                                                                                                                                    | Heitman Lab |
| CdLC743               | <i>C. dubliniensis</i> 36                     | Clinical isolate                                                                                                                                                                    | (1)         |
| CaLC5083              | <i>C. auris</i> Ci6684                        | Clinical isolate                                                                                                                                                                    | (2)         |
| CpLC6144              | <i>Candida parapsilosis</i><br>(ATCC® 22019™) | Clinical isolate                                                                                                                                                                    | ATCC        |
| CaLC239               | SN95                                          | <i>arg/arg4 his1/his1</i><br><i>URA3/ura3::imm<sup>434</sup></i><br><i>IRO1/iro1::imm<sup>434</sup></i>                                                                             | (3)         |
| CaLC555               | CAI4 <i>cyr1Δ/cyr1Δ</i>                       | <i>ura3::imm<sup>434</sup>/ura3::imm<sup>434</sup></i><br><i>cyr1::hisG-URA3-hisG/cyr1::hisG</i>                                                                                    | (4)         |
| CaLC563               | CAI4 <i>efg1Δ/efg1Δ</i>                       | <i>ura3::imm<sup>434</sup>/ura3::imm<sup>434</sup></i><br><i>efg1::hisG/efg1::hisG-URA3-hisG</i>                                                                                    | (5)         |
| CaLC564               | CAI4 <i>ras1Δ/ras1Δ</i>                       | <i>ura3::imm<sup>434</sup>/ura3::imm<sup>434</sup></i><br><i>ras1::hisG/ras1::hph</i>                                                                                               | (6)         |
| CaLC914               | CAI4 <i>cph1Δ/cph1Δ</i>                       | <i>ura3::imm<sup>434</sup>/ura3::imm<sup>434</sup></i><br><i>cph1::hisG/cph1::hisG-URA3-hisG</i>                                                                                    | (7)         |
| CaLC922               | CAI4 <i>HSP70p-lacZ</i>                       | <i>ura3::imm<sup>434</sup>/ura3::imm<sup>434</sup></i><br><i>HSP70/HSP70p-lacZ::URA3</i>                                                                                            | (8)         |
| CaLC1566              | SN152<br><i>ume6Δ/ume6Δ</i>                   | <i>ume6::C. maltosa LEU2/ume6::C. dubliniensis HIS1 arg4::ARG4/arg4</i><br><i>leu2/leu2 his1/his1</i><br><i>ura3::imm<sup>434</sup>/URA3</i><br><i>iro1::imm<sup>434</sup>/IRO1</i> | (9)         |
| CaLC2445              | CAI4 <i>cek1Δ/cek1Δ</i>                       | <i>ura3/ura3 cek1::hisG-URA3-hisG/cek1::hisG</i>                                                                                                                                    | (10)        |
| CaLC2560/<br>CaLC2561 | SN95 <i>tec1Δ/tec1Δ</i>                       | <i>arg4/arg4 his1/his1</i><br><i>URA3/ura3::imm<sup>434</sup></i><br><i>IRO1/iro1::imm<sup>434</sup></i><br><i>tec1::FRT/tec1::FRT</i>                                              | (11)        |
| CaLC2676              | SN95 <i>bcr1Δ/bcr1Δ</i>                       | <i>arg4 /arg4 his1/his1</i><br><i>URA3/ura3::imm<sup>434</sup></i><br><i>IRO1/iro1::imm<sup>434</sup></i><br><i>bcr1::FRT/bcr1::FRT</i>                                             | (11)        |

|          |                                                                     |                                                                                                                                                                                                                                                                                     |      |
|----------|---------------------------------------------------------------------|-------------------------------------------------------------------------------------------------------------------------------------------------------------------------------------------------------------------------------------------------------------------------------------|------|
| CaLC2737 | SN152 <i>brg1Δ/brg1Δ</i>                                            | <i>arg4/arg4 leu2/leu2 his1/his1</i><br><i>URA3/ura3::imm<sup>434</sup></i><br><i>IRO1/iro1::imm<sup>434</sup> brg1::C. albicans</i><br><i>HIS1/brg1::C. albicans LEU2</i>                                                                                                          | (12) |
| CaLC2740 | SN152 (Homann library WT)                                           | <i>arg4/arg4 leu2/leu2::C. albicans</i><br><i>LEU2 his1/his1::C. albicans HIS1</i><br><i>URA3/ura3::imm<sup>434</sup></i><br><i>IRO1/iro1::imm<sup>434</sup></i>                                                                                                                    | (12) |
| CaLC2742 | CAF2-1                                                              | <i>ura3::imm<sup>434</sup>/URA3</i>                                                                                                                                                                                                                                                 | (13) |
| CaLC2897 | SN95 <i>flo8Δ/flo8Δ</i>                                             | <i>arg4/arg4 his1/his1</i><br><i>URA3/ura3::imm<sup>434</sup></i><br><i>IRO1/iro1::imm<sup>434</sup> flo8::FRT/flo8::FRT</i>                                                                                                                                                        | (14) |
| CaLC3067 | SN95 Hsp104-GFP                                                     | <i>arg/arg4 his1/his1</i><br><i>URA3/ura3::imm<sup>434</sup></i><br><i>IRO1/iro1::imm<sup>434</sup> HSP104/HSP104-GFP</i>                                                                                                                                                           | (15) |
| CaLC3431 | SN152 <i>ace2Δ/ace2Δ</i>                                            | <i>arg4/arg4 leu2/leu2 his1/his1</i><br><i>URA3/ura3::imm<sup>434</sup></i><br><i>IRO1/iro1::imm<sup>434</sup> ace2::C. albicans</i><br><i>HIS1/ace2::C. albicans LEU2</i>                                                                                                          | (12) |
| CaLC4506 | SN95 Nop1-GFP                                                       | <i>arg4 /arg4 his1 /his1</i><br><i>URA3/ura3::imm<sup>434</sup></i><br><i>IRO1/iro1::imm<sup>434</sup> NOP1-GFP-</i><br><i>HIS/NOP1</i>                                                                                                                                             | (14) |
| CaLC5039 | SN152 <i>tetO-HSF1/tetO-HSF1</i><br><i>ume6Δ/ume6Δ</i><br>(preflip) | <i>ume6::C. maltosa LEU2/ume6::C. dubliniensis</i><br><i>HIS1 arg4::ARG4/arg4 leu2/leu2 his1/his1 ura3</i><br><i>::imm<sup>434</sup>/URA3 iro1 ::imm<sup>434</sup>/IRO1</i><br><i>NEUT5L-FRT-ENO1p-Cas9-NAT-snR52p-HSF1p sgRNA-FRT/NEUT5L</i><br><i>TAR-tetO-HSF1/TAR-tetO-HSF1</i> | (16) |
| CaLC5084 | SN152HLA (WT)                                                       | <i>arg4::hisG/ARG4, his1::hisG/HIS1,</i><br><i>leu2::hisG/LEU2</i><br><i>ura3::λimm434::URA3-IRO1/ura3::</i><br><i>λimm434</i>                                                                                                                                                      | (17) |
| CaLC5088 | SN152 <i>tpk1Δ/tpk1Δ</i><br><i>tpk2Δ/tpk2Δ</i>                      | <i>ura3::λimm434::URA3-IRO1/ura3::</i><br><i>λimm434, tpk2::HIS1/ tpk2::ARG4,</i><br><i>tpk1::LEU2/ tpk1::FRT</i>                                                                                                                                                                   | (17) |
| CaLC5275 | SN250 <i>tetO-HSF1/tetO-HSF1</i><br>(preflip)                       | <i>arg4/arg4 his1/his1</i><br><i>leu2::C.dubliniensis</i><br><i>HIS1/leu2::C.maltosa LEU2</i><br><i>URA3/ura3::imm<sup>434</sup></i><br><i>IRO1/iro1::imm<sup>434</sup></i>                                                                                                         | (17) |

|              |                                                        |                                                                                                                                                                                                                                   |            |
|--------------|--------------------------------------------------------|-----------------------------------------------------------------------------------------------------------------------------------------------------------------------------------------------------------------------------------|------------|
|              |                                                        | <i>NEUT5L-FRT-ENO1p-Cas9-NAT-snr52p-HSF1p sgRNA-FRT/NEUT5L TAR-tetO-HSF1/TAR-tetO-HSF1</i>                                                                                                                                        |            |
| CaLC5277     | SN152 <i>tetO-HSF1/tetO-HSF1 brg1Δ/brg1Δ</i> (preflip) | <i>arg4/arg4 leu2/leu2 his1/his1 URA3/ura3::imm<sup>434</sup> IRO1/iro1 ::imm<sup>434</sup> brg1::C. albicans HIS1/brg1::C. albicans LEU2 NEUT5L-FRT-ENO1p-Cas9-NAT-snr52p-HSF1p sgRNA-FRT/NEUT5L TAR-tetO-HSF1/TAR-tetO-HSF1</i> | (17)       |
| CaLC6152     | CAF2-1 <i>tetO-RPT5/tetO-RPT5</i>                      | <i>ura3::imm<sup>434</sup>/URA3 TAR-FRT::tetO-RPT5/ TAR-FRT::tetO-RPT5</i>                                                                                                                                                        | This study |
| CaLC6153     | CAI4 <i>tetO-RPT5/tetO-RPT5 efg1Δ/efg1Δ</i>            | <i>ura3::imm<sup>434</sup>/ura3::imm<sup>434</sup> efg1::hisG/efg1::hisG-URA3-hisG TAR-FRT::tetO-RPT5/ TAR-FRT::tetO-RPT5</i>                                                                                                     | This study |
| CaLC6196     | CAI4 <i>ras1Δ/ras1Δ</i>                                | <i>ura3::imm<sup>434</sup>/ura3::imm<sup>434</sup> ras1::hisG/ras1::hph TAR-FRT::tetO-RPT5/ TAR-FRT::tetO-RPT5</i>                                                                                                                | This study |
| CaLC6227     | CAI4 <i>cyr1Δ/cyr1Δ</i>                                | <i>ura3::imm<sup>434</sup>/ura3::imm<sup>434</sup> cyr1::hisG-URA3-hisG/cyr1::hisG TAR-FRT::tetO-RPT5/ TAR-FRT::tetO-RPT5</i>                                                                                                     | This study |
| CaLC6106     | GRACE parent strain (CaSS1)                            | <i>ura3::imm<sup>434</sup>/ura3::imm<sup>434</sup> his3::hisG/his3::hisG leu2::tetR-GAL4AD-URA/LEU2</i>                                                                                                                           | (18)       |
| GRACE strain | <i>tetO-PRE1/pre1Δ</i>                                 | As GRACE parent <i>SAT1::tetO-PRE1/pre1::HIS3</i>                                                                                                                                                                                 | (18)       |
| GRACE strain | <i>tetO-PRE2/pre2Δ</i>                                 | As GRACE parent <i>SAT1::tetO-PRE2/pre2::HIS3</i>                                                                                                                                                                                 | (18)       |
| GELC0586     | <i>tetO-PRE3/pre3Δ</i>                                 | As GRACE parent <i>SAT1::tetO-PRE3/pre3::HIS3</i>                                                                                                                                                                                 | This Study |
| GELC0394     | <i>tetO-PRE4/pre4Δ</i>                                 | As GRACE parent <i>SAT1::tetO-PRE4/pre4::HIS3</i>                                                                                                                                                                                 | This Study |
| GRACE strain | <i>tetO-PRE5/pre5Δ</i>                                 | As GRACE parent <i>SAT1::tetO-PRE5/pre5::HIS3</i>                                                                                                                                                                                 | (18)       |
| GRACE strain | <i>tetO-PRE6/pre6Δ</i>                                 | As GRACE parent <i>SAT1::tetO-PRE6/pre6::HIS3</i>                                                                                                                                                                                 | (18)       |
| GRACE strain | <i>tetO-PRE7/pre7Δ</i>                                 | As GRACE parent <i>SAT1::tetO-PRE7/pre7::HIS3</i>                                                                                                                                                                                 | (18)       |
| GRACE strain | <i>tetO-PRE8/pre8Δ</i>                                 | As GRACE parent <i>SAT1::tetO-PRE8/pre8::HIS3</i>                                                                                                                                                                                 | (18)       |

|              |                          |                                                      |            |
|--------------|--------------------------|------------------------------------------------------|------------|
| GELC0910     | <i>tetO-PRE9/pre9Δ</i>   | As GRACE parent <i>SAT1::tetO-PRE9/pre9Δ::HIS3</i>   | This Study |
| GELC0118     | <i>tetO-PRE10/pre10Δ</i> | As GRACE parent <i>SAT1::tetO-PRE10/pre10Δ::HIS3</i> | This Study |
| GRACE strain | <i>tetO-PUP1/pup1Δ</i>   | As GRACE parent <i>SAT1::tetO-PUP1/pup1::HIS3</i>    | (18)       |
| GRACE strain | <i>tetO-PUP2/pup2Δ</i>   | As GRACE parent <i>SAT1::tetO-PUP2/pup2::HIS3</i>    | (18)       |
| GELC0583     | <i>tetO-PUP3/pup3Δ</i>   | As GRACE parent <i>SAT1::tetO-PUP3/pup3::HIS3</i>    | This study |
| GRACE strain | <i>tetO-SCL1/scl1Δ</i>   | As GRACE parent <i>SAT1::tetO-SCL1/scl1::HIS3</i>    | (18)       |
| GRACE strain | <i>tetO-RPN3/rpn3Δ</i>   | As GRACE parent <i>SAT1::tetO-RPN3/rpn3::HIS3</i>    | (18)       |
| GRACE strain | <i>tetO-RPN5/rpn5Δ</i>   | As GRACE parent <i>SAT1::tetO-RPN5/rpn5::HIS3</i>    | (18)       |
| GRACE strain | <i>tetO-RPN6/rpn6Δ</i>   | As GRACE parent <i>SAT1::tetO-RPN6/rpn6::HIS3</i>    | (18)       |
| GRACE strain | <i>tetO-RPN7/rpn7Δ</i>   | As GRACE parent <i>SAT1::tetO-RPN7/rpn7::HIS3</i>    | (18)       |
| GRACE strain | <i>tetO-RPN8/rpn8Δ</i>   | As GRACE parent <i>SAT1::tetO-RPN8/rpn8::HIS3</i>    | (18)       |
| GELC0058     | <i>tetO-RPN9/rpn9Δ</i>   | As GRACE parent <i>SAT1::tetO-RPN9/rpn9::HIS3</i>    | This Study |
| GELC0588     | <i>tetO-SEM1/sem1Δ</i>   | As GRACE parent <i>SAT1::tetO-SEM1/SEM1::HIS3</i>    | This Study |
| GRACE strain | <i>tetO-RPN11/rpn11Δ</i> | As GRACE parent <i>SAT1::tetO-RPN11/rpn11::HIS3</i>  | (18)       |
| GRACE strain | <i>tetO-RPN12/rpn12Δ</i> | As GRACE parent <i>SAT1::tetO-RPN12/rpn12::HIS3</i>  | (18)       |
| GRACE strain | <i>tetO-RPT1/rpt1Δ</i>   | As GRACE parent <i>SAT1::tetO-RPT1/rpt1::HIS3</i>    | (18)       |
| GELC0395     | <i>tetO-RPT2/rpt2Δ</i>   | As GRACE parent <i>SAT1::tetO-RPT2/rpt2::HIS3</i>    | This Study |
| GRACE strain | <i>tetO-RPT3/rpt3Δ</i>   | As GRACE parent <i>SAT1::tetO-PR26/pr26::HIS3</i>    | (18)       |
| GRACE strain | <i>tetO-RPT4/rpt4Δ</i>   | As GRACE parent <i>SAT1::tetO-RPT4/rpt4::HIS3</i>    | (18)       |
| GRACE strain | <i>tetO-RPT5/rpt5Δ</i>   | As GRACE parent <i>SAT1::tetO-RPT5/rpt5::HIS3</i>    | (18)       |
| GRACE strain | <i>tetO-RPT6/rpt6Δ</i>   | As GRACE parent <i>SAT1::tetO-RPT6/rpt6::HIS3</i>    | (18)       |

|              |                          |                                                     |            |
|--------------|--------------------------|-----------------------------------------------------|------------|
| GRACE strain | <i>tetO-RPN1/rpn1Δ</i>   | As GRACE parent <i>SAT1::tetO-RPN1/rpn1::HIS3</i>   | (18)       |
| GRACE strain | <i>tetO-RPN2/rpn2Δ</i>   | As GRACE parent <i>SAT1::tetO-RPN2/rpn2::HIS3</i>   | (18)       |
| GELC0260     | <i>tetO-RPN10/rpn10Δ</i> | As GRACE parent <i>SAT1::tetO-RPN10/rpn10::HIS3</i> | This study |
| GRACE strain | <i>tetO-RPN13/rpn13Δ</i> | As GRACE parent <i>SAT1::tetO-RPN13/rpn13::HIS3</i> | (18)       |
| HELC0260     | <i>RPN10/rpn10Δ</i>      | As GRACE parent <i>RPN10/rpn10::HIS3</i>            | This study |
| HELC0583     | <i>PUP3/pup3Δ</i>        | As GRACE parent <i>PUP3/pup3::HIS3</i>              | This study |
| HELC0586     | <i>PRE3/pre3Δ</i>        | As GRACE parent <i>PRE3/pre3::HIS3</i>              | This Study |
| HELC0588     | <i>SEM1/sem1Δ</i>        | As GRACE parent <i>SEM1/SEM1::HIS3</i>              | This Study |
| HELC0910     | <i>PRE9/pre9Δ</i>        | As GRACE parent <i>PRE9/pre9Δ::HIS3</i>             | This Study |

### References:

1. Sullivan DJ, Westerneng TJ, Haynes KA, Bennett DE, Coleman DC. 1995. *Candida dubliniensis* sp. nov.: phenotypic and molecular characterization of a novel species associated with oral candidosis in HIV-infected individuals. *Microbiol Read Engl* 141 ( Pt 7):1507–1521.
2. Chatterjee S, Alampalli SV, Nageshan RK, Chettiar ST, Joshi S, Tatu US. 2015. Draft genome of a commonly misdiagnosed multidrug resistant pathogen *Candida auris*. *BMC Genomics* 16:686.
3. Noble SM, Johnson AD. 2005. Strains and strategies for large-scale gene deletion studies of the diploid human fungal pathogen *Candida albicans*. *Eukaryot Cell* 4:298–309.
4. Jain P, Akula I, Edlind T. 2003. Cyclic AMP signaling pathway modulates susceptibility of *Candida* species and *Saccharomyces cerevisiae* to antifungal azoles and other sterol biosynthesis inhibitors. *Antimicrob Agents Chemother* 47:3195–3201.
5. Braun BR, Johnson AD. 2000. *TUP1*, *CPH1* and *EFG1* make independent contributions to filamentation in *Candida albicans*. *Genetics* 155:57–67.
6. Feng Q, Summers E, Guo B, Fink G. 1999. Ras signaling is required for serum-induced hyphal differentiation in *Candida albicans*. *J Bacteriol* 181:6339–6346.
7. Liu H, Kohler J, Fink GR. 1994. Suppression of hyphal formation in *Candida albicans* by mutation of a STE12 homolog. *Science* 266:1723–1726.
8. Shapiro RS, Uppuluri P, Zaas AK, Collins C, Senn H, Perfect JR, Heitman J, Cowen LE. 2009. Hsp90 orchestrates temperature-dependent *Candida albicans* morphogenesis via Ras1-PKA Signaling. *Curr Biol* 19:621–629.
9. Banerjee M, Thompson DS, Lazzell A, Carlisle PL, Pierce C, Monteagudo C, López-Ribot JL, Kadosh D. 2008. *UME6*, a novel filament-specific regulator of *Candida albicans* hyphal extension and virulence. *Mol Biol Cell* 19:1354–1365.

10. Csank C, Schröppel K, Leberer E, Harcus D, Mohamed O, Meloche S, Thomas DY, Whiteway M. 1998. Roles of the *Candida albicans* mitogen-activated protein kinase homolog, Cek1p, in hyphal development and systemic candidiasis. *Infect Immun* 66:2713–2721.
11. Diezmann S, Leach MD, Cowen LE. 2015. Functional divergence of Hsp90 genetic interactions in biofilm and planktonic cellular states. *PLOS ONE* 10:e0137947.
12. Homann OR, Dea J, Noble SM, Johnson AD. 2009. A phenotypic profile of the *Candida albicans* regulatory network. *PLoS Genet* 5:e1000783.
13. Fonzi WA, Irwin MY. 1993. Isogenic strain construction and gene mapping in *Candida albicans*. *Genetics* 134:717–728.
14. Xie JL, O’Meara TR, Polvi EJ, Robbins N, Cowen LE. 2017. Staurosporine induces filamentation in the human fungal pathogen *Candida albicans* via signaling through Cyr1 and protein kinase A. *mSphere* 2:e00056-17.
15. Leach MD, Kim T, DiGregorio SE, Collins C, Zhang Z, Duennwald ML, Cowen LE. 2017. *Candida albicans* is resistant to polyglutamine aggregation and toxicity. *G3 Genes Genomes Genet* 7:95–108.
16. Veri AO, Miao Z, Shapiro RS, Tebbji F, O’Meara TR, Kim SH, Colazo J, Tan K, Vyas VK, Whiteway M, Robbins N, Wong KH, Cowen LE. 2018. Tuning Hsf1 levels drives distinct fungal morphogenetic programs with depletion impairing Hsp90 function and overexpression expanding the target space. *PLOS Genet* 14:e1007270.
17. Cao C, Wu M, Bing J, Tao L, Ding X, Liu X, Huang G. 2017. Global regulatory roles of the cAMP/PKA pathway revealed by phenotypic, transcriptomic and phosphoproteomic analyses in a null mutant of the PKA catalytic subunit in *Candida albicans*. *Mol Microbiol* 105:46–64.
18. Roemer T, Jiang B, Davison J, Ketela T, Veillette K, Breton A, Tandia F, Linteau A, Sillaots S, Marta C, Martel N, Veronneau S, Lemieux S, Kauffman S, Becker J, Storms R, Boone C, Bussey H. 2003. Large-scale essential gene identification in *Candida albicans* and applications to antifungal drug discovery. *Mol Microbiol* 50:167–181.
