# Supplementary material for: The Proteasome Governs Fungal Morphogenesis via Functional Connections with Hsp90 and cAMP-Protein Kinase A Signaling
Source: PubMed Central journal article supplement (PMC7175089; doi:10.1128/mbio.00290-20), 2020-04-21
Supplement: mBio.00290-20-st002.pdf [file mBio.00290-20-st002.pdf]

**Table S2:** Plasmids used in this study.

| Plasmid | Description                                                                                   | Source     |
|---------|-----------------------------------------------------------------------------------------------|------------|
| pLC49   | p863 (for gene disruption with <i>FLP-NAT</i> )                                               | (1)        |
| pLC605  | <i>CaTAR-FLP-NAT-tetO</i>                                                                     | (2)        |
| pLC763  | <i>Ca-FLP-NAT-tetO</i>                                                                        | This study |
| pLC963  | pV1393-1 (CaCas9/sgRNA entry expression vector, contains NatR gene, targeting <i>NEUT5L</i> ) | (2)        |
| pLC1237 | pUC19 Vector                                                                                  | NEB (3)    |
| pLC1251 | <i>Ca-HIS3</i> (for gene disruption)                                                          | This study |

**References:**

1. Shen J, Guo W, Köhler JR. 2005. *CaNAT1*, a heterologous dominant selectable marker for transformation of *Candida albicans* and other pathogenic *Candida* species. *Infect Immun* 73:1239–1242.
2. Veri AO, Miao Z, Shapiro RS, Tebbji F, O’Meara TR, Kim SH, Colazo J, Tan K, Vyas VK, Whiteway M, Robbins N, Wong KH, Cowen LE. 2018. Tuning Hsf1 levels drives distinct fungal morphogenetic programs with depletion impairing Hsp90 function and overexpression expanding the target space. *PLOS Genet* 14:e1007270.
3. Yanisch-Perron C, Vieira J, Messing J. 1985. Improved M13 phage cloning vectors and host strains: nucleotide sequences of the M13mpl8 and pUC19 vectors. *Gene* 33:103–119.
