# Supplementary material for: The Proteasome Governs Fungal Morphogenesis via Functional Connections with Hsp90 and cAMP-Protein Kinase A Signaling
Source: PubMed Central journal article supplement (PMC7175089; doi:10.1128/mbio.00290-20), 2020-04-21
Supplement: mBio.00290-20-st003.pdf [file mBio.00290-20-st003.pdf]

**Table S3:** Oligonucleotides used in this study.

| Name                              | Description          | Sequence (5' -> 3')                                                                                 |
|-----------------------------------|----------------------|-----------------------------------------------------------------------------------------------------|
| GRACE and HET strain construction |                      |                                                                                                     |
| oLC118.1                          | <i>PRE10</i> Primer1 | ACAACTTACTCTCTTCTTTTGTAAATCATTACAACAATTCTT<br>ATATAACTAATATTTTATCTATATCACTGGATGGCGGCGTTAG<br>TATC   |
| oLC118.2                          | <i>PRE10</i> Primer2 | TGAAGTCTATAAATCAGTTAGTATACATGAGCAATGCATTGTG<br>TTTAGTTGTAACAAATTGACATACCATCGACTATTTATATTTGT<br>ATG  |
| oLC118.3                          | <i>PRE10</i> Primer3 | GCCATTTTAACTGTACTGCCAT                                                                              |
| oLC118.4                          | <i>PRE10</i> Primer4 | TTTTCAACGGCTTTCATGGCAT                                                                              |
| oLC394.1                          | <i>PRE4</i> Primer1  | ATTGCATTTAAGTTTTTATATTTTGTATAACTTTTTTTTTGAAA<br>AACAAGAAGAAAACAATCACGAAAACTGGATGGCGGCGTT<br>AGTATC  |
| oLC394.2                          | <i>PRE4</i> Primer2  | CAATTTTGTAAATTGTATGGACCATAGGTGTCATTGGATGGTCT<br>ACCCCAACTGTATGGATCGTGATTCATCGACTATTTATATTTGT<br>ATG |
| oLC394.3                          | <i>PRE4</i> Primer3  | GGTGTAAGCTTTACAGTGGTTT                                                                              |
| oLC394.4                          | <i>PRE4</i> Primer4  | ACCAACAACAGTCTCCTTACCT                                                                              |
| oLC395.1                          | <i>RPT2</i> Primer1  | TCTTATTTCTTGGTGCGAGTTTTCAAATCAAACATTATTTGT<br>ATATCCCACTCCAAGCAAGCAATCACTGGATGGCGGCGTT<br>AGTATC    |
| oLC395.2                          | <i>RPT2</i> Primer2  | CCTTTTTCTTATCATCTTTCTTTTTGTTGAGATTATCGCCACCTG<br>GTATTCCTGAAGGACCTTGACCCATCGACTATTTATATTTGTAT<br>G  |
| oLC395.3                          | <i>RPT2</i> Primer3  | ATGCTTGTCAAGAAACACATCC                                                                              |
| oLC395.4                          | <i>RPT2</i> Primer4  | TGCTTCTGTAGTTGGAATGCT                                                                               |
| oLC58.1                           | <i>RPN9</i> Primer1  | AACCAACCAACCAAGACAACCTATCTTCTTATAGACCACC<br>CTTAAGATCAACAACAATATGTCGCCAACTGGATGGCGGCGT<br>TAGTATC   |
| oLC58.2                           | <i>RPN9</i> Primer2  | TTAATTCAGAATTATCTGATTTTCAGCCTAATTGTTGCTAAAAC<br>GTAGAAACTTCAGTATCTATATCCATCGACTATTTATATTTGTA<br>TG  |
| oLC58.3                           | <i>RPN9</i> Primer3  | TTATTTCAAGTGCCTGCTTTGA                                                                              |
| oLC58.4                           | <i>RPN9</i> Primer4  | CAACATCATCAGTAACTCTATAATTATGAC                                                                      |
| oLC260.1                          | <i>RPN10</i> Primer1 | TTCAACAGTGTTGATTTTCAATTCTTTACCCTATCCCTAAAACG<br>TACAGTATTATATTAAGAAACAAAACTGGATGGCGGCGTT<br>AGTATC  |
| oLC260.2                          | <i>RPN10</i> Primer2 | ATGTCAAAAAGTCACCATTCTCATATACTCAGAGTTGTCAAT<br>GGCAATCATAGTAGCCTCAAGAACCATCGACTATTTATATTTG<br>TATG   |

|          |                      |                                                                                                             |
|----------|----------------------|-------------------------------------------------------------------------------------------------------------|
| oLC260.3 | <i>RPN10</i> Primer3 | TATATGAGCAGTTCTTGGACGT                                                                                      |
| oLC260.4 | <i>RPN10</i> Primer4 | CAATGCTGCTACTTGGATTCCG                                                                                      |
| oLC260.5 | <i>RPN10</i> Primer5 | ACCCTATCCCTAAAACGTACAGTATTATATTAAAGAAACAAA<br>GATGTCCACGAGGTCTCTAGACCTTGCACATGCTTGC GCGTAC<br>GCTGCAGGTCGAC |
| oLC260.6 | <i>RPN10</i> Primer6 | CGAATATAGTATTATTTTTATTATGCTTCATATTCTATACAGCC<br>GGTGTCGGTCTCGTAGAGACTTCGATCATGCTCTTGATCGATG<br>AATTCGAGCTCG |
| oLC583.1 | <i>PUP3</i> Primer1  | AGTGGACCCAATTGAATAGAATATCTCAATAGATTATAAATTA<br>CTATCCTCATTCTCAATTTAACAGATCACTGGATGGCGGCGTT<br>AGTATC        |
| oLC583.2 | <i>PUP3</i> Primer2  | CTATTGCTATACAGTCTTTACCAATCATAGCTACTGCTGCACCT<br>CCGTTAATTGAAAATGGATCCGACATCGACTATTTATATTTGT<br>ATG          |
| oLC583.3 | <i>PUP3</i> Primer3  | GAGATTTTGTACAAGTATCTTCATTG                                                                                  |
| oLC583.4 | <i>PUP3</i> Primer4  | ACCAAATTTGCCAATGTTGATG                                                                                      |
| oLC583.5 | <i>PUP3</i> Primer5  | AGATTATAAATTACTATCCTCATTCTCAATTTAACAGATCATGG<br>ATGTCCACGAGGTCTCTTCAAATTCATTAGTTTAGAACGTACG<br>CTGCAGGTCGAC |
| oLC583.6 | <i>PUP3</i> Primer6  | TCAAATCATGTATTATCTGCTAACTTTATAACATATAAATCAAC<br>GGTGTCGGTCTCGTAGAACCGCTGTACGGTGATTGCATCGAT<br>GAATTCGAGCTCG |
| oLC586.1 | <i>PRE3</i> Primer1  | AAAAAAAAACTAGTGGCAAACCACCTTAATCAACAATTTCTTA<br>ACATCATCAAACATAGCATAATCAACAACCTGGATGGCGGCGT<br>TAGTATC       |
| oLC586.2 | <i>PRE3</i> Primer2  | CCATAATTGAAGTACCTAAATTCACTTCCCCCTTTTTCAAATGA<br>TTGATGTCTACTGAAATACCGTTCATCGACTATTTATATTTGTA<br>TG          |
| oLC586.3 | <i>PRE3</i> Primer3  | TGTTGTTGTTGTTGTTGAATGG                                                                                      |
| oLC586.4 | <i>PRE3</i> Primer4  | CCAGGAGGCAATTGTGATGAAT                                                                                      |
| oLC586.5 | <i>PRE3</i> Primer5  | CAACAATTTCTAACATCATCAAACATAGCATAATCAACAATG<br>GATGTCCACGAGGTCTCTCGTGTGCGACGTCTCACTGGCGTA<br>CGCTGCAGGTCGAC  |
| oLC586.6 | <i>PRE3</i> Primer6  | CAGATTATCTTATTCTATCTACCGAATATAAAAGCATTTTTATC<br>GGTGTCGGTCTCGTAGTTGTCCCACCGCCTACGTGAATCGAT<br>GAATTCGAGCTCG |
| oLC588.1 | <i>SEM1</i> Primer1  | GAACGAGGAAAAAAAAAATGTCATGAGTGGCAACCACTACT<br>TAGTCAACATCAAATCAATAGTACCATAACTGGATGGCGGCG<br>TTAGTATC         |
| oLC588.2 | <i>SEM1</i> Primer2  | TGAGACCTGATGTATGTTTCAGAGGGATTGTAGTAGATGGTT<br>TAGAATCTAGTTTGGTGGCGTCTGACATCGACTATTTATATTT<br>GTATG          |
| oLC588.3 | <i>SEM1</i> Primer3  | ACAATATAGCCAGCCTGATTT                                                                                       |

|                              |                         |                                                                                                             |
|------------------------------|-------------------------|-------------------------------------------------------------------------------------------------------------|
| oLC588.4                     | <i>SEM1</i> Primer4     | AGACACTTCATCTTGACCATCA                                                                                      |
| oLC588.5                     | <i>SEM1</i> Primer5     | GCAACCACTACTTAGTCAACATCAAATCAATAGTACCATAATG<br>GATGTCCACGAGGTCTCTACTGGAGCTGTCTACATCCTCGTAC<br>GCTGCAGGTCGAC |
| oLC588.6                     | <i>SEM1</i> Primer6     | CCTTTTCCTGTAAATAATCAACTAAGAAAGCATCTAACTATC<br>GGTGTCCGGTCTCGTAGCGCTGTCGCGATGGACTTGTATCGAT<br>GAATTCGAGCTCG  |
| oLC910.1                     | <i>PRE9</i> Primer1     | TTTAAGAACTGATACTGTTGAACTAAAGTACTACAAACTAT<br>TATCAAAGCTAAACAAGACCATATACCACTGGATGGCGGCGT<br>TAGTATC          |
| oLC910.2                     | <i>PRE9</i> Primer2     | CATATTCACCTGGTATAATCTACCTTCTGGTGAAAAATAGT<br>GGTTCTTGAATCGTATCTTCTTGACATCGACTATTTATATTTGT<br>ATG            |
| oLC910.3                     | <i>PRE9</i> Primer3     | AAATTGGTGATCTGCGACATTT                                                                                      |
| oLC910.4                     | <i>PRE9</i> Primer4     | CTGTTGGGCTTGAATTCTTGCA                                                                                      |
| oLC910.5                     | <i>PRE9</i> Primer5     | AGTACTACAAACTATTATCAAAGCTAAACAAGACCATATAACC<br>GATGTCCACGAGGTCTCTCACCTATCAGGAGACGTGAGCGTA<br>CGCTGCAGGTCGAC |
| oLC910.6                     | <i>PRE9</i> Primer6     | ACACTAAATCTAAACTGGTAGTCCTATAAACATCAGTATAT<br>CGGTGTCCGGTCTCGTAGGGCCTATTGTCAGTGCCCTTATCGAT<br>GAATTCGAGCTCG  |
| Primers for <i>tetO-RPT5</i> |                         |                                                                                                             |
| oLC534                       | CaTAR-797-R             | GATGGAGATAGTTTACGG                                                                                          |
| oLC4714                      | tetOp+488F              | TCGTTTCTGATGGGCTTTTC                                                                                        |
| oLC5978                      | pLC963-SNR52-F          | GACTGTCAAGGAGGGTATTC                                                                                        |
| oLC5979                      | pLC963-SNR52-N-F        | CCGCAAGTGATTAGACTTAG                                                                                        |
| oLC5980                      | pLC963-sgRNA-R          | GAATACCACTTGTTTACCGG                                                                                        |
| oLC5981                      | pLC963-sgRNA-N-R        | GGTGGCGGCAAACTAATTC                                                                                         |
| oLC6924                      | <i>CaCas9</i> /for      | ATCTCATTAGATTTGGAAGTTGTGGGTT                                                                                |
| oLC6925                      | <i>CaCas9</i> /rev      | TTCGAGCGTCCCAAACCTTCT                                                                                       |
| oLC7838                      | <i>CaRPT5</i> -pLC605-R | TCAAAATTTCTTGATCTATAACATTTTCTTCTTGTGCTGATTGT<br>TTTCTAAATCTTCTAAGGTAACCATCGACTATTTATATTTGTAT<br>G           |
| oLC7839                      | <i>CaRPT5</i> -pLC605-F | GGGAGAAAAAAAATGCTAGGGAAAGACTCGACCTCTCCC<br>AATTACAGAATACTACAACGTATCAACAGGAAACAGCTATG<br>ACCATG              |
| oLC7840                      | <i>CaRPT5</i> -320-F-AB | AATAAGCGGCGGATTTGG                                                                                          |
| oLC7841                      | <i>CaRPT5</i> +304R-AB  | GCTCTAGCTGCGTCGATAT                                                                                         |
| oLC7842                      | <i>CaRPT5</i> _sgRNA_F  | TACTACAACGTATCAACAAGTTTTAGAGCTAGAAATAGCAA<br>GTAAA                                                          |
| oLC7843                      | <i>CaRPT5</i> _sgRNA_R  | TTGTTGATACAGTTGTAGTACAAATTAATAATAGTTTACGCAA<br>GTC                                                          |
| RT PCR Primers               |                         |                                                                                                             |

|                    |                             |                              |
|--------------------|-----------------------------|------------------------------|
| oLC8159            | <i>CaRPN9</i> +AB+808F      | CGGCTGAAACTAATTCTAAT         |
| oLC8161            | <i>CaRPN9</i> +AB+981R      | CCTCAATTAGAATTAGCTCC         |
| oLC2285            | <i>CaACT1AB</i> +855-F      | GACCTTGAGATACCCAATTG         |
| oLC2286            | <i>CaACT1AB</i> +1076-R     | CAGCTTGAATGGAAACGTAG         |
| oLC752             | <i>GPD1A</i> +570-F         | AGTATGTGGAGCTTTACTGGGA       |
| oLC753             | <i>GPD1AB</i> +766-R        | CAGAAACACCAGCAACATCTTC       |
| oLC8121            | <i>CaRPN13</i> -AB+704R     | GTGACATCAAATACCCTGCTC        |
| oLC8122            | <i>CaRPN13</i> -AB+589F     | CTTCCTCCATCAATTGCTTC         |
| oLC8092            | <i>CaRPT5_AB</i> +233F      | TGGTGGGAAATGTTGTGGAG         |
| oLC8093            | <i>CaRPT5_AB</i> +373R      | GTCAACTAACCTATCATTGG         |
| oLC8485            | <i>CaRPN10_AB</i> +129F     | AACCCTGAAAATACAGTCGG         |
| oLC8486            | <i>CaRPN10_AB</i> +311R     | TGATTCTTTGCTGTTGGACC         |
| oLC8488            | <i>CaPRE9_AB</i> +322F      | CGACGAAGAGATTCCTTGTG         |
| oLC8489            | <i>CaPRE9_AB</i> +477R      | CACCAATACTAGTTGCCTTC         |
| oLC8491            | <i>CaSEM1_AB</i> +049F      | ACCATCTACTACAATCCCTC         |
| oLC8492            | <i>CaSEM1_AB</i> +191R      | ATCATCCCAATCTTCTTCCC         |
| Additional primers |                             |                              |
| oLC2535            | <i>TetOp</i> -F             | GTTTGGTTCAGCACCTTGTCG        |
| oLC6853            | <i>SAT1_R</i>               | CGCAGAAAGTAATATCATGC         |
| oLC6701            | <i>CaHIS3prom_UPtag_R10</i> | CCACCATCTAAATTAAGGGC         |
| oLC7860            | BamHI_ <i>HIS3_F</i>        | CGCGGATCCCGTACGCTGCAGGTCGAC  |
| oLC7861            | <i>HIS3_BamHI_R</i>         | CGCGGATCCATCGATGAATTCGAGCTCG |
